# Supplementary material for: Achieving highly practical capacitance of MnO2 by using chain-like CoB alloy as support
Source: Royal Society of Chemistry journal article supplement (doi:10.1039/c8nr01004h), 2018-01-01
Supplement: c8nr01004h1.pdf [file c8nr01004h1.pdf]

## **Electronic Supplementary Information (ESI)**

### **Achieving highly practical capacitance of MnO<sub>2</sub> by using chain-like CoB alloy as support**

Jingjing Yan,<sup>a</sup> Hui Wang,<sup>a</sup> Shan Ji,<sup>b\*</sup> Bruno G. Pollet,<sup>c</sup> and Rongfang Wang,<sup>a\*\*</sup>

<sup>a</sup> Institute of Chemical Engineering, Qingdao University of Science and Technology,  
Qingdao, 266042, China

<sup>b</sup> College of Biological, Chemical Science and Chemical Engineering, Jiaying  
University, Jiaying, 314001, China

<sup>c</sup> Department of Energy and Process Engineering, Faculty of Engineering, Norwegian  
University of Science and Technology (NTNU), NO-7491 Trondheim, Norway

#### **Corresponding authors:**

Shan Ji (\*): [jishan@mail.zjxu.edu.cn](mailto:jishan@mail.zjxu.edu.cn), Tel./fax: +86 (0)15024355548

Rongfang Wang (\*\*): [wrf38745779@126.com](mailto:wrf38745779@126.com), Tel./fax: +86-931-7971533

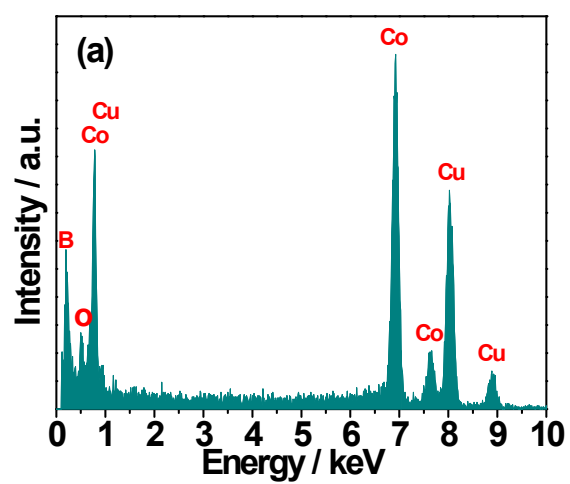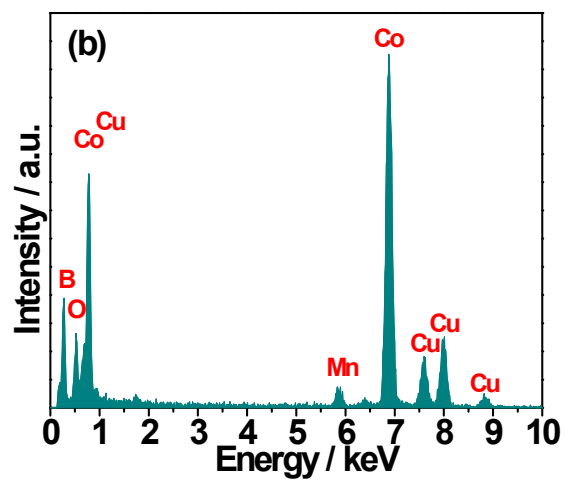

**Figure S1.** EDS patterns of (a)CoB and (b)CoB@MnO<sub>2</sub>

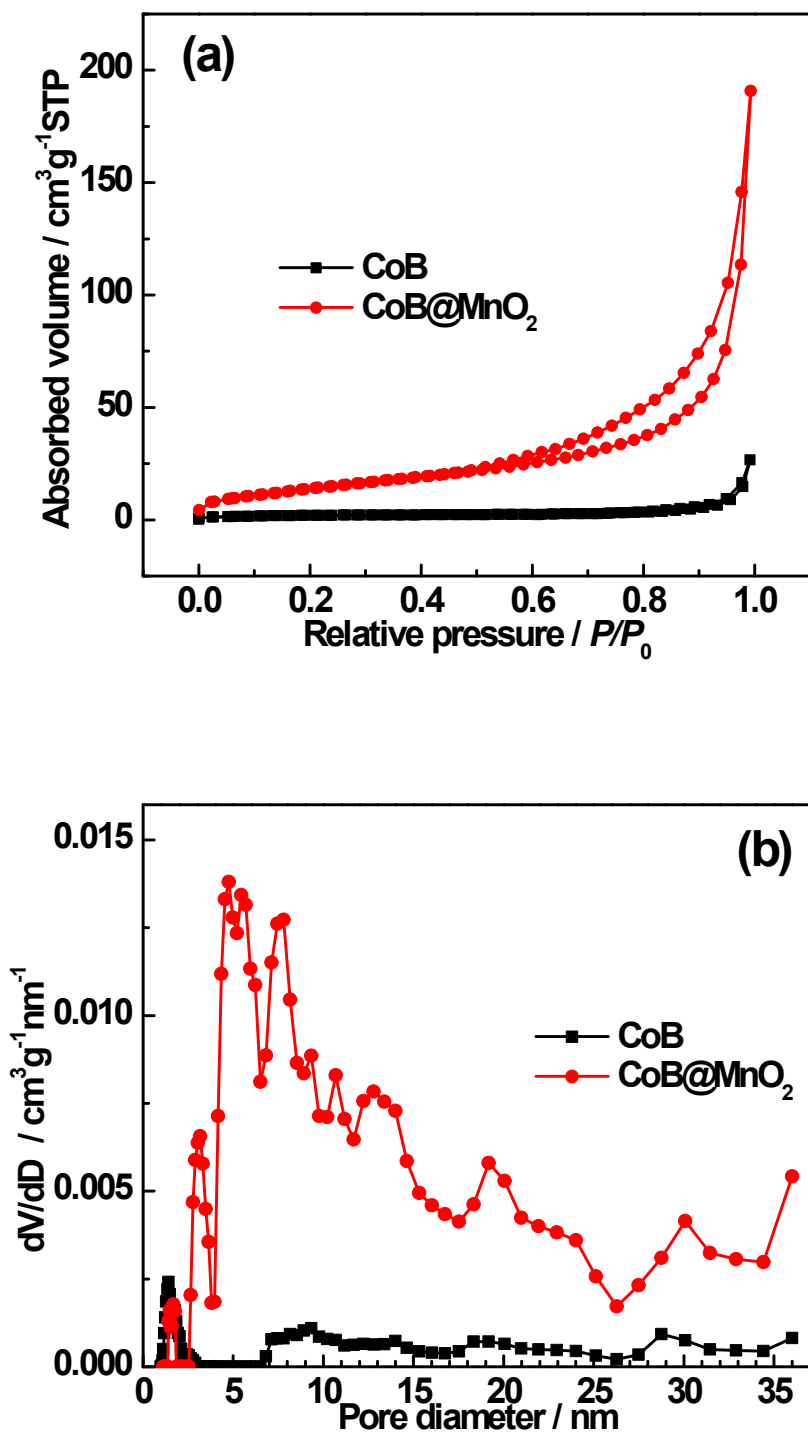

Figure S2. (a) N<sub>2</sub> isotherms and (b) pore size distribution of CoB and CoB@MnO<sub>2</sub>.

**Table S1.** A summary of our CoB-core@MnO<sub>2</sub>-shell with the value obtained from some other conductive core@MnO<sub>2</sub>-shell independent literatures.

| Sample core-shell             | The literature | The potential window | The specific capacitance (F g <sup>-1</sup> ) | <sup>a</sup> Current density | <sup>b</sup> Retention(%) / cycling number / <sup>c</sup> current density | Electrolyte                           |
|-------------------------------|----------------|----------------------|-----------------------------------------------|------------------------------|---------------------------------------------------------------------------|---------------------------------------|
| CoB@MnO <sub>2</sub>          | Our work       | 0.8 V                | 612.0                                         | 0.5 A g <sup>-1</sup>        | 97.7%/6000/2 A g <sup>-1</sup>                                            | 3 M LiOH                              |
| Au@MnO <sub>2</sub>           | [18]           | 0.8 V                | 601                                           | 0.5 A g <sup>-1</sup>        | 85%/1000/1 A g <sup>-1</sup>                                              | 2 M Li <sub>2</sub> SO <sub>4</sub>   |
| Ni@MnO <sub>2</sub>           | [45]           | 0.85 V               | 502                                           | 5 mV s <sup>-1</sup>         | 93%/500/5 mV s <sup>-1</sup>                                              | 0.1 M Na <sub>2</sub> SO <sub>4</sub> |
| CNT@MnO <sub>2</sub>          | [46]           | 1.0 V                | 110                                           | 5.3 A g <sup>-1</sup>        | 88%/2500/50 A g <sup>-1</sup>                                             | 1 M Na <sub>2</sub> SO <sub>4</sub>   |
| Petal-like C@MnO <sub>2</sub> | [8]            | 1.0 V                | 163                                           | 2 mV s <sup>-1</sup>         | 97.8%/5000/100 mV s <sup>-1</sup>                                         | 1 M Na <sub>2</sub> SO <sub>4</sub>   |
| C@MnO <sub>2</sub>            | [11]           | 0.8 V                | 252                                           | 0.5 A g <sup>-1</sup>        | 74%/2000/5 A g <sup>-1</sup>                                              | 1 M Na <sub>2</sub> SO <sub>4</sub>   |
| CNF@MnO <sub>2</sub>          | [47]           | 0.8 V                | 321                                           | 0.5 A g <sup>-1</sup>        | 100%/1000/5 A g <sup>-1</sup>                                             | 0.1 M Na <sub>2</sub> SO <sub>4</sub> |
| PANI@MnO <sub>2</sub>         | [17]           | 0.9 V                | 262                                           | 0.5 A g <sup>-1</sup>        | 93%/800/3 A g <sup>-1</sup>                                               | 0.5 M Na <sub>2</sub> SO <sub>4</sub> |
| PANI@MnO <sub>2</sub>         | [48]           | 0.9 V                | 290                                           | 0.2 A g <sup>-1</sup>        | 96%/3000/2 A g <sup>-1</sup>                                              | 1 M KCl                               |
| PANI@MnO <sub>2</sub>         | [49]           | 0.85 V               | 330                                           | 0.5 A g <sup>-1</sup>        | 94%/1000/1 A g <sup>-1</sup>                                              | 0.1 M Na <sub>2</sub> SO <sub>4</sub> |
| PANI@MnO <sub>2</sub>         | [50]           | 0.7 V                | 627                                           | 2 A g <sup>-1</sup>          | 55%/1000/10 A g <sup>-1</sup>                                             | 1 M H <sub>2</sub> SO <sub>4</sub>    |

a: the specific capacitance and areal capacitance was obtained at the current density.

b: after cycling test, the retention of the specific capacitance.

c: the cycling test was carried out with the current density.  
d: the value was calculated based on the data in the literature.  
CNF: Carbon nanofiber, CNT: Carbon nanotube, PANI: Ployaniline

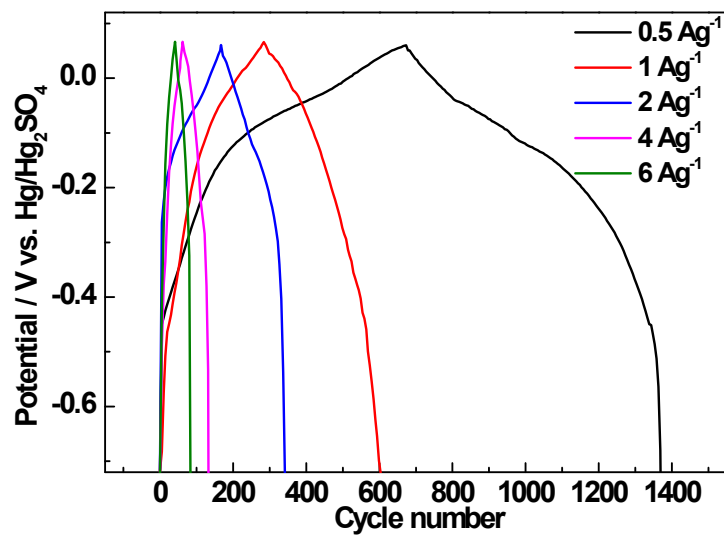

**Figure S3.** Galvanostatic charge-discharge curves of the CoB electrode at different current densities of 0.5, 1, 2, 4, and 6 A g<sup>-1</sup> respectively.

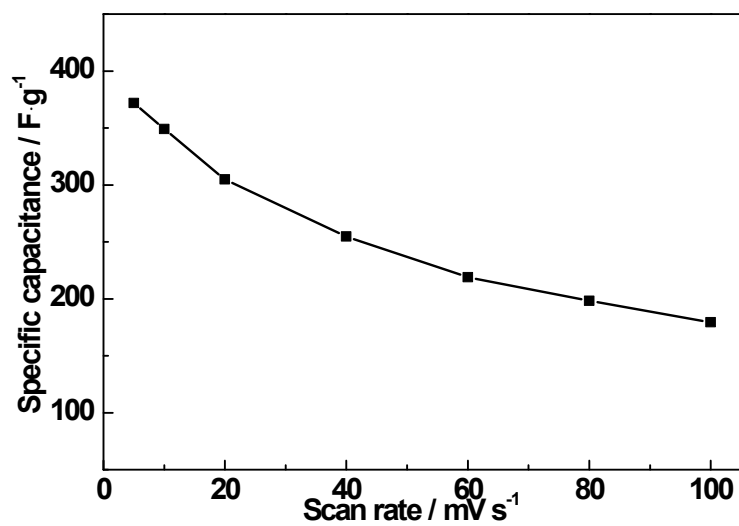

**Figure S4.** Specific capacitance of CoB@MnO<sub>2</sub> vs. scan rate.
